# Supplementary material for: Enhancing Soil Nitrogen Retention Capacity by Biochar Incorporation in the Acidic Soil of Pomelo Orchards: The Crucial Role of pH
Source: MDPI journal article supplement (doi:10.3390/agronomy13082110), 2023-08-11
Supplement: s1 [file s1]

Archive with 1 entries (1 files):
- agronomy-2545429-SI.pdf
