# Supplementary material for: Enhancing Soil Nitrogen Retention Capacity by Biochar Incorporation in the Acidic Soil of Pomelo Orchards: The Crucial Role of pH
Source: MDPI journal article supplement (doi:10.3390/agronomy13082110), 2023-08-11
Supplement: s1 [file s1 › agronomy-2545429-SI.pdf]

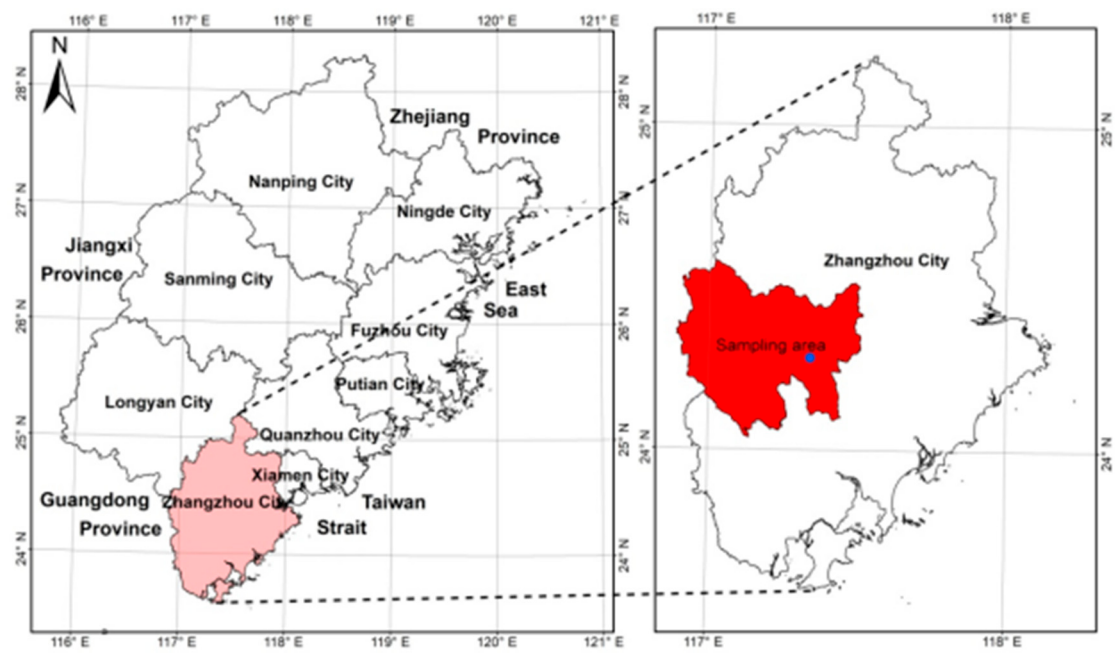

Figure S1. Blue point is the location of the soil sampling area

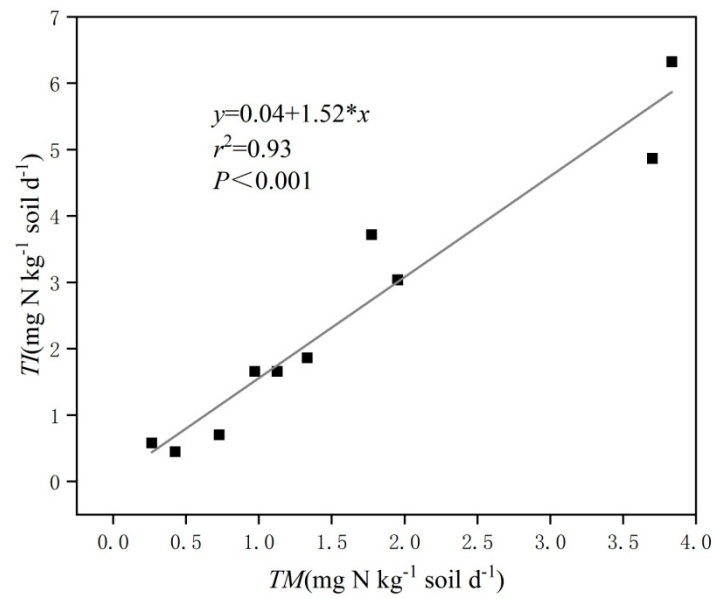

Figure S2. The relationship between  $TM$  and  $TI$ . The standard errors of the means ( $n=3$ ) are shown as vertical bars. Where  $TM$  = the gross mineralization rates;  $TI$  = the gross  $NH_4^+$  immobilization rates.

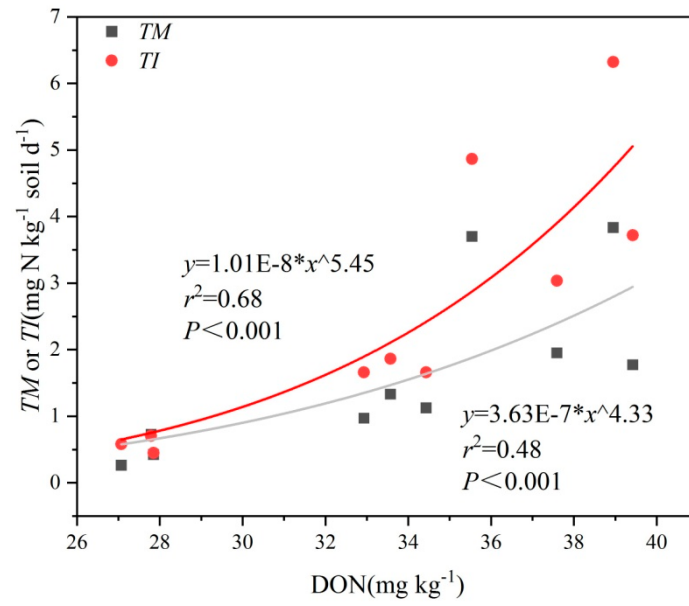

Figure S3. The relationship between DON and *TM* (*TI*) . The standard errors of the means (n=3) are shown as vertical bars. Where *TM* = mineralization of organic N to  $\text{NH}_4^+$ ; *TI*= immobilization of  $\text{NH}_4^+$  to organic N.

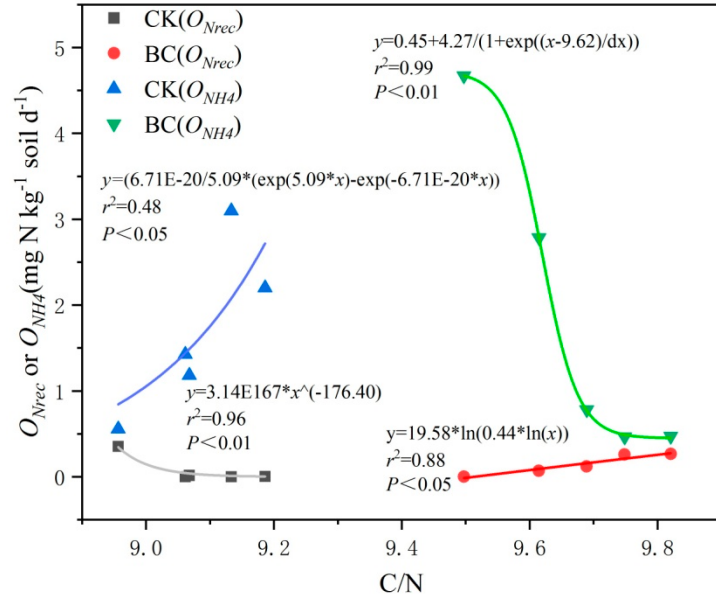

Figure S4. The relationship between C/N and  $O_{Nrec}$ . The standard errors of the means ( $n=3$ ) are shown as vertical bars. Where  $O_{Nrec}$  =oxidation of recalcitrant organic N to  $\text{NO}_3^-$ ;  $O_{NH4}$  = oxidation of  $\text{NH}_4^+$  to  $\text{NO}_3^-$ .
